# Supplementary material for: Neutral sphingomyelinase mediates the co-morbidity trias of alcohol abuse, major depression and bone defects
Source: PubMed Central journal article supplement (PMC8872992; doi:10.1038/s41380-021-01304-w), 2021-09-28
Supplement: 41380_2021_1304_MOESM2_ESM.pdf [file 41380_2021_1304_MOESM2_ESM.pdf]

Table S1: Descriptive data for the study participants

|                                                 | N      | Mean   | SD     | Min  | Max   |
|-------------------------------------------------|--------|--------|--------|------|-------|
| Genotype data                                   | 456693 |        |        |      |       |
| Behavioural data                                |        |        |        |      |       |
| Alcohol Drink Frequency                         | 456693 | 2.95   | 1.522  | 1    | 6     |
| Nervous Feelings                                | 456693 | 0.236  | 0.423  | 0    | 1     |
| Worrier/Anxious Feelings                        | 456693 | 0.565  | 0.497  | 0    | 1     |
| Alcohol Drinker Status                          | 456693 | 1.874  | 0.437  | 0    | 2     |
| Frequency of Depressed Mood in the last 2 weeks | 456693 | 1.308  | 0.624  | 1    | 4     |
| Bone Density data                               |        |        |        |      |       |
| Right Femur Bone Mineral Density                | 4515   | 0.7467 | 0.157  | 0    | 1.476 |
| Left Femur Bone Mineral Density                 | 4515   | 0.7396 | 0.157  | 0    | 1.408 |
| Neuroimaging data                               |        |        |        |      |       |
| T1 grey matter                                  |        |        |        |      |       |
| Insula                                          | 4515   | 12589  | 1309.9 | 7645 | 18600 |
| Hippocampus                                     | 4515   | 8596   | 817.5  | 5700 | 11870 |

Table S2: List of 26 haplotype within SMPD3 with MHF > 0.01.

|       | rs117949548_TC | rs71395853_TC | rs79978301_GA | rs117668880_AG | rs55847153_TC | rs11646700_GA | rs8051517_CT | rs9940558_TA | rs12444999_TC | rs1111232_CT | rs1364344_CT | rs1125848_CT | rs80343315_AG | rs16957943_TC | Frequency |
|-------|----------------|---------------|---------------|----------------|---------------|---------------|--------------|--------------|---------------|--------------|--------------|--------------|---------------|---------------|-----------|
| Hap1  | C              | C             | A             | G              | C             | G             | T            | T            | C             | C            | C            | C            | G             | C             | 0.323763  |
| Hap2  | C              | C             | A             | G              | C             | A             | T            | A            | C             | C            | C            | C            | G             | C             | 0.322046  |
| Hap3  | C              | C             | A             | G              | C             | G             | T            | A            | C             | C            | C            | C            | G             | C             | 0.246824  |
| Hap4  | C              | C             | A             | G              | C             | A             | T            | A            | C             | T            | T            | T            | G             | C             | 0.189457  |
| Hap5  | C              | C             | G             | G              | C             | G             | T            | T            | C             | C            | C            | C            | G             | C             | 0.181035  |
| Hap6  | C              | C             | A             | G              | C             | A             | T            | A            | C             | C            | T            | T            | G             | C             | 0.053996  |
| Hap7  | C              | T             | A             | G              | C             | A             | C            | A            | C             | C            | C            | C            | G             | C             | 0.051039  |
| Hap8  | C              | C             | A             | G              | C             | A             | T            | A            | C             | C            | T            | C            | G             | C             | 0.048444  |
| Hap9  | C              | C             | A             | G              | T             | A             | T            | A            | C             | C            | C            | C            | G             | C             | 0.046985  |
| Hap10 | T              | C             | A             | G              | C             | A             | T            | A            | C             | T            | C            | C            | G             | C             | 0.04297   |
| Hap11 | C              | C             | A             | A              | C             | A             | T            | A            | C             | T            | T            | T            | G             | C             | 0.037925  |
| Hap12 | C              | C             | A             | G              | C             | G             | T            | T            | T             | C            | C            | C            | G             | C             | 0.037026  |
| Hap13 | C              | C             | A             | G              | C             | A             | T            | A            | C             | T            | C            | C            | G             | C             | 0.036998  |
| Hap14 | C              | C             | A             | G              | C             | A             | T            | A            | C             | T            | C            | T            | G             | C             | 0.036643  |
| Hap15 | C              | C             | A             | G              | C             | G             | T            | T            | C             | C            | C            | C            | G             | T             | 0.032435  |
| Hap16 | C              | C             | A             | G              | C             | G             | T            | A            | C             | T            | C            | C            | G             | C             | 0.027291  |
| Hap17 | C              | T             | A             | G              | C             | A             | C            | A            | C             | T            | C            | C            | G             | C             | 0.02349   |
| Hap18 | C              | C             | A             | G              | C             | A             | T            | A            | C             | C            | C            | T            | G             | C             | 0.023313  |
| Hap19 | C              | C             | A             | G              | C             | G             | C            | A            | C             | C            | C            | C            | G             | C             | 0.019138  |
| Hap20 | C              | C             | A             | G              | C             | G             | T            | T            | C             | C            | C            | C            | A             | C             | 0.018689  |
| Hap21 | C              | C             | A             | G              | C             | A             | T            | A            | C             | T            | T            | C            | G             | C             | 0.0163    |
| Hap22 | C              | C             | A             | G              | C             | G             | T            | T            | C             | C            | T            | T            | G             | C             | 0.015851  |
| Hap23 | C              | C             | A             | G              | C             | G             | C            | T            | C             | C            | C            | C            | G             | C             | 0.013018  |
| Hap24 | C              | C             | A             | G              | C             | G             | T            | T            | C             | T            | C            | C            | G             | C             | 0.012519  |
| Hap25 | C              | C             | A             | A              | C             | A             | T            | A            | C             | T            | C            | C            | G             | C             | 0.011625  |
| Hap26 | C              | C             | A             | G              | C             | G             | T            | T            | C             | C            | C            | T            | G             | C             | 0.010564  |

Table S3: Hotelling's t-test between Haplotype phases and behavioural phenotypes. P-values are significant at level 0.05 \*, 0.01\*\*, 0.001\*\*\*.

|       | Combined behavioural outcomes         | Alcohol Intake Frequency               | Nervous Feelings       | Worrier/Anxious Feelings | Alcohol Drinker Status                 | Frequency of Depressed Mood           |
|-------|---------------------------------------|----------------------------------------|------------------------|--------------------------|----------------------------------------|---------------------------------------|
| Hap1  | F=15.3; p=1.567×10 <sup>-14</sup> *** | F=34.926; p=3.427×10 <sup>-9</sup> *** | p=0.4974               | p=0.4937                 | F=63.89; p=1.317×10 <sup>-15</sup> *** | F=7.376; p=0.00661**                  |
| Hap2  | p=0.58832                             | p=0.1253                               | p=0.9984               | p=0.6978                 | p=0.1312                               | p=0.4100                              |
| Hap3  | F=24.6; p=4.096×10 <sup>-24</sup> *** | F=100.19; p=2.17×10 <sup>-29</sup> *** | p=0.1003               | F=11.694; p=0.000627***  | F=60.55; p=7.203×10 <sup>-15</sup> *** | p=0.7528                              |
| Hap4  | F=5.0; p=2.663×10 <sup>-4</sup> ***   | F=17.87; p=2.371×10 <sup>-5</sup> ***  | p=0.5611               | p=0.9964                 | F=18.85; p=1.414×10 <sup>-5</sup> ***  | p=0.2104                              |
| Hap5  | F=32.0; p=6.157×10 <sup>-32</sup> *** | F=128.2; p=2.88×10 <sup>-36</sup> ***  | p=0.4631               | p=0.057                  | F=72.57; p=6.53×10 <sup>-23</sup> ***  | F=17.38; p=3.058×10 <sup>-5</sup> *** |
| Hap6  | F=17.2; p=1.963×10 <sup>-16</sup> *** | F=55.74; p=8.279×10 <sup>-14</sup> *** | F=5.383; p=0.0203*     | F=9.004; p=0.00269**     | F=39.42; p=3.413×10 <sup>-10</sup> *** | F=6.317; p=0.0120*                    |
| Hap7  | F=3.1; p=0.0110*                      | F=4.070; p=0.0437                      | p=0.1234               | p=0.3543                 | F=5.37; p=0.0204*                      | F=4.5693; p=0.0326*                   |
| Hap8  | F=36.2; p=2.964×10 <sup>-36</sup> *** | F=140.1; p=7.72×10 <sup>-41</sup> ***  | p=0.0844               | p=0.1569                 | F=101.74; p=4.60×10 <sup>-33</sup> *** | F=13.28; p=0.0002685***               |
| Hap9  | F=8.1; p=3.133×10 <sup>-7</sup> ***   | F=26.57; p=2.54×10 <sup>-7</sup> ***   | F=4.154; p=0.04154*    | F=4.953; p=0.0260*       | F=22.95; p=1.665×10 <sup>-6</sup> ***  | p=0.9857                              |
| Hap10 | F=13.5; p=1.219×10 <sup>-12</sup> *** | F=51.43; p=7.445×10 <sup>-13</sup> *** | p=0.4151               | p=0.6205                 | F=35.82; p=2.16×10 <sup>-9</sup> ***   | F=9.988; p=0.001575**                 |
| Hap11 | F=10.2; p=2.359×10 <sup>-9</sup> ***  | F=20.48; p=6.02×10 <sup>-6</sup> ***   | p=0.1972               | p=0.8324                 | F=43.24; p=4.84×10 <sup>-11</sup> ***  | p=0.0808                              |
| Hap12 | F=46.3; p=7.275×10 <sup>-47</sup> *** | F=168.55; p=1.36×10 <sup>-51</sup> *** | p=0.1826               | p=0.2448                 | F=175.59; p=3.37×10 <sup>-59</sup> *** | F=5.938; p=0.0148*                    |
| Hap13 | p=0.4391                              | p=0.4339                               | p=0.1190               | p=0.3344                 | p=0.2916                               | p=0.1940                              |
| Hap14 | F=3.7; p=0.00395**                    | F=8.4095; p=0.00444**                  | p=0.1856               | F=5.8921; p=0.01521*     | F=10.20; p=0.001404**                  | p=0.6021                              |
| Hap15 | F=3.6; p=0.00444**                    | F=9.724; p=0.001819**                  | F=6.167; p=0.01302*    | p=0.11223                | F=7.898; p=0.00495**                   | p=0.09850                             |
| Hap16 | F=5.0; p=2.663×10 <sup>-4</sup> ***   | F=15.32; p=9.091×10 <sup>-5</sup> ***  | F=4.039; p=0.04445*    | p=0.8194                 | F=11.0838; p=0.0008709***              | p=0.2207                              |
| Hap17 | p=0.89544                             | p=0.391                                | p=0.7211               | p=0.4326                 | p=0.9490                               | p=0.9283                              |
| Hap18 | p=0.28586                             | p=0.8308                               | p=0.1735               | p=0.3768                 | p=0.3030                               | p=0.8959                              |
| Hap19 | F=5.2; p=1.944×10 <sup>-4</sup> ***   | F=18.47; p=1.727×10 <sup>-5</sup> ***  | p=0.4144               | p=0.1234                 | F=14.11; p=0.000172***                 | p=0.5145                              |
| Hap20 | p=0.081301                            | p=0.2569                               | F=4.984; p=0.02559*    | p=0.2115                 | p=0.2006                               | p=0.3440                              |
| Hap21 | F=69.4; p=2.283×10 <sup>-71</sup> *** | F=183.45; p=7.37×10 <sup>-55</sup> *** | p=0.2613               | F=4.450; p=0.0349*       | F=315.58; p=1.08×10 <sup>-92</sup> *** | p=0.2099                              |
| Hap22 | p=0.26642                             | F=4.874; p=0.0273*                     | p=0.3403               | p=0.2270                 | p=0.1814                               | p=0.6923                              |
| Hap23 | F=4.9; p=3.185×10 <sup>-4</sup> ***   | F=19.36; p=1.080×10 <sup>-5</sup> ***  | p=0.9430               | p=0.4608                 | F=13.06; p=0.0003021***                | p=0.1343                              |
| Hap24 | p=0.10100                             | p=0.8170                               | F=7.3551; p=0.006688** | p=0.1602                 | p=0.4619                               | p=0.1412                              |
| Hap25 | F=4.5; p=7.025×10 <sup>-4</sup> ***   | F=20.09; p=7.394×10 <sup>-6</sup> ***  | p=0.7720               | p=0.9488                 | F=11.62; p=0.0006512***                | p=0.2301                              |
| Hap26 | p=0.36528                             | p=0.1502                               | p=0.0975               | p=0.9199                 | p=0.7987                               | p=0.5087                              |

Table S4: Univariate association between Haplotype phases and bone mineral density. P-values are significant at level 0.05 \*, 0.01\*\*, 0.001\*\*\*.

|       | Correlation with Right Femur Bone Mineral Density | Correlation with Left Femur Bone Mineral Density |
|-------|---------------------------------------------------|--------------------------------------------------|
| Hap1  | p=0.793731                                        | p=0.796045                                       |
| Hap2  | p=0.831496                                        | p=0.443547                                       |
| Hap3  | p=0.323869                                        | p=0.292664                                       |
| Hap4  | p=0.924677                                        | p=0.88726                                        |
| Hap5  | p=0.81418                                         | p=0.65231                                        |
| Hap6  | p=0.133779                                        | p=0.108344                                       |
| Hap7  | p=0.934147                                        | p=0.777612                                       |
| Hap8  | p=0.333305                                        | p=0.646753                                       |
| Hap9  | p=0.417121                                        | p=0.424202                                       |
| Hap10 | p=0.630329                                        | p=0.521556                                       |
| Hap11 | p=0.389839                                        | p=0.322977                                       |
| Hap12 | p=0.241528                                        | p=0.314492                                       |
| Hap13 | p=0.272385                                        | p=0.594835                                       |
| Hap14 | p=0.326566                                        | p=0.314511                                       |
| Hap15 | p=0.577672                                        | p=0.481141                                       |
| Hap16 | p=0.052785                                        | p=0.241304                                       |
| Hap17 | p=0.548409                                        | p=0.792932                                       |
| Hap18 | p=0.523122                                        | p=0.462524                                       |
| Hap19 | p=0.774004                                        | p=0.666006                                       |
| Hap20 | p=0.720126                                        | p=0.606242                                       |
| Hap21 | p=0.332789                                        | p=0.562485                                       |
| Hap22 | p=0.932951                                        | p=0.577543                                       |
| Hap23 | p=0.231819                                        | p=0.183841                                       |
| Hap24 | p=0.131046                                        | p=0.086701                                       |
| Hap25 | p=0.248203                                        | p=0.431569                                       |
| Hap26 | t=3.109, p=0.001888, p-FDR=0.04909*               | t=3.329, p=0.000878, p-FDR=0.04563*              |
